# Supplementary material
Source: PubMed Central journal article supplement (PMC4888233)
Supplement: EMBJ-35-1236-s002.pdf [file EMBJ-35-1236-s002.pdf]

## Expanded View Figures

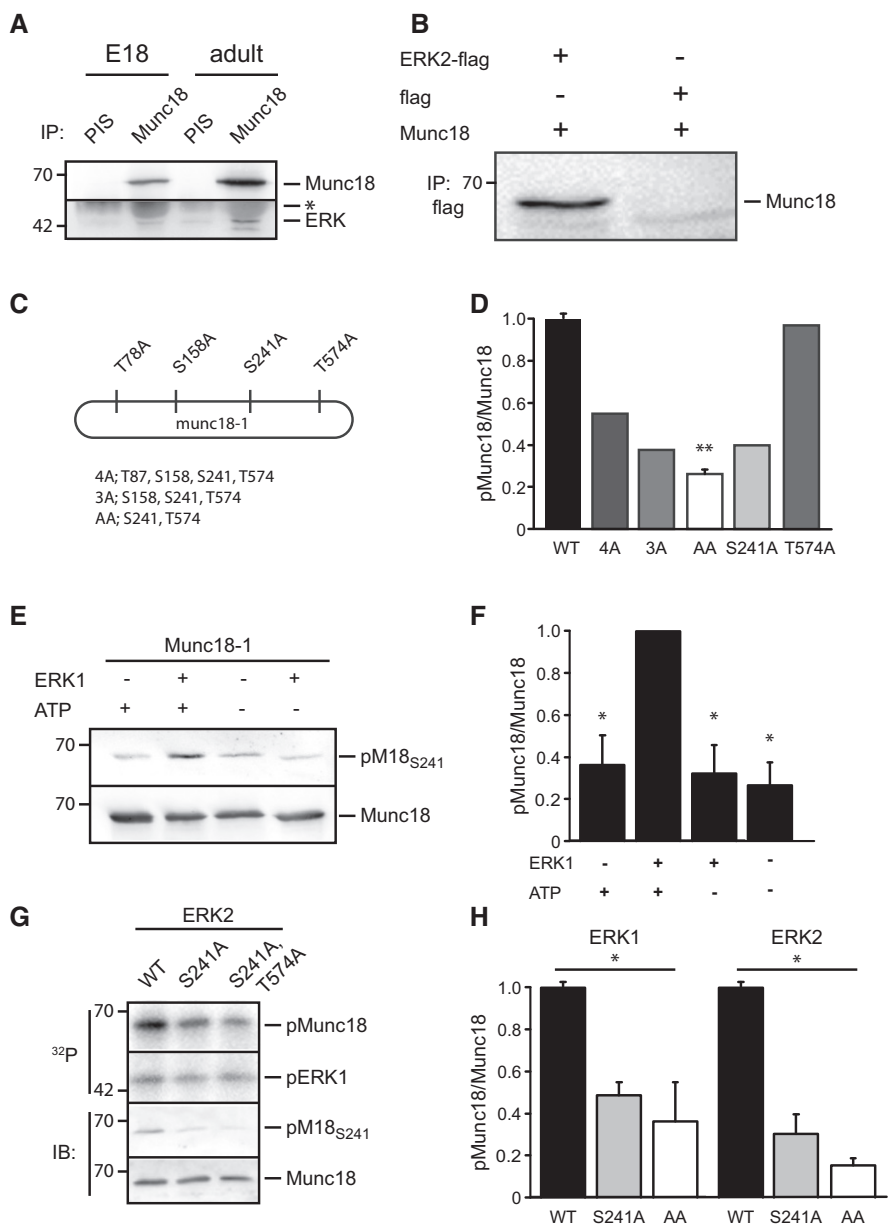

**Figure EV1. ERK1/2 binds and phosphorylates Munc18-1.**

Related to Figure 1.

A, B Binding between Munc18-1 and ERK in brain and in HEK293T cells. (A) Co-immunoprecipitation (IP) of ERK and Munc18-1 from embryonic (E18) or adult brain lysate with Munc18-1 antibody, but not with pre-immune serum (PIS). The immunoglobulin heavy chain is visible (\*) above the ERK band. (B) Co-immunoprecipitation from HEK293T cells transfected with Munc18-1 and ERK2-flag or empty-flag (as negative control) with flag antibody. Western blot is stained for Munc18-1.

C Diagram of Munc18-1 showing 4 potential ERK phosphorylation sites (P-X-S/T-P). These sites were mutated to alanine yielding 4A (T87A, S158A, S241A, and T574A), 3A (S158A, S241A, and T574A), AA (S241A and T574A), T574A and S241A.

D Quantification of radioactive phospho-Munc18-1 intensity in different Munc18-1 mutants from Fig 1B. Phosphorylation was measured as the amount of <sup>32</sup>P incorporation in Munc18-1 normalized to total Munc18. Phosphorylation of Munc18<sub>WT</sub> was set as 100% (Munc18<sub>WT</sub>: 100 ± 3%, n = 3; Munc18<sub>4A</sub>: 55%, n = 1; Munc18<sub>3A</sub>: 38%, n = 1; Munc18<sub>AA</sub>: 24 ± 2%, n = 3, \*\*P < 0.01; Munc18<sub>S241A</sub>: 36%, n = 1; Munc18<sub>T574A</sub>: 100%, n = 1), one-way ANOVA.

E–H Test of phospho-specific Munc18<sub>S241</sub> antibody. (E) *In vitro* ERK kinase assay, HEK293T cells were transfected with biotinylated Munc18-1. Protein complexes were precipitated with streptavidin-coated magnetic beads and subjected to *in vitro* ERK kinase assay with recombinant ERK1. Western blots were stained with a phospho-specific antibody directed against pS241 (pM18<sub>S241</sub>) and Munc18-1 antibody. (F) Quantification of (E).

Phosphorylation was measured as ratio of pM18<sub>S241</sub> over total Munc18. Condition ERK1 plus ATP was set as 100% (n = 3, \*P < 0.05), one-way ANOVA. (G) *In vitro* ERK kinase assay, HEK293T cells were transfected with M18<sub>WT</sub>, M18<sub>S241A,T574A</sub>, and M18<sub>S241A</sub>. Munc18-1 variants were immune-precipitated and subjected to *in vitro* kinase assay with recombinant ERK2. Radioactive phosphoblot and immunoblot of *in vitro* ERK kinase assay are stained with pM18<sub>S241</sub> and Munc18-1 antibody. (H) Quantification of phosphorylation as pM18<sub>S241</sub> intensity in (G) normalized to total Munc18. Phosphorylation of M18<sub>WT</sub> was set to 100% (n = 3 for ERK1 and ERK2 *in vitro* assays, \*P < 0.05), one-way ANOVA.

Data information: Data are expressed as mean ± SEM.

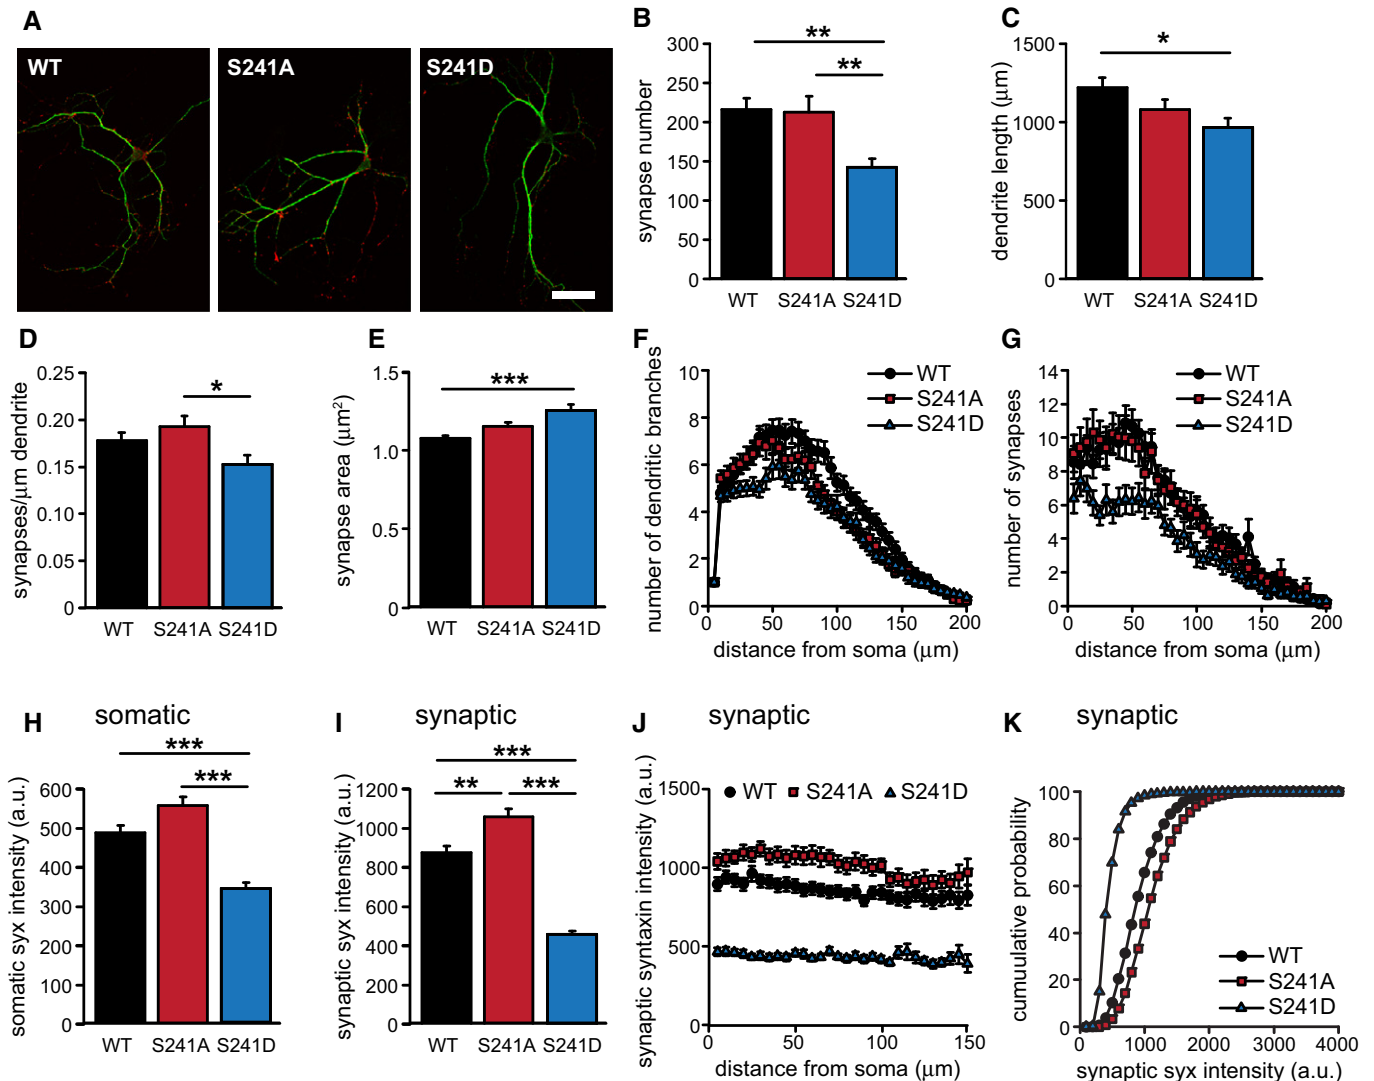

**Figure EV2. Neuronal morphology of rescued Munc18-1 null mutant cells.**

Related to Figure 4. Hippocampal autaptic neurons of Munc18-1 null mutant mice were rescued with lentiviruses expressing M18<sub>WT</sub>, M18<sub>S241A</sub>, or M18<sub>S241D</sub> and stained for dendritic MAP2, synapse marker VAMP2, and syntaxin.

A Typical examples. MAP2 (green), VAMP2 (red). Scale bar represents 50  $\mu\text{m}$ .

B Mean synapse number per cell (M18<sub>WT</sub>:  $216 \pm 15$ ,  $n = 51$ ; M18<sub>S241A</sub>:  $214 \pm 21$ ,  $n = 46$ ; M18<sub>S241D</sub>:  $143 \pm 11$ ,  $n = 40$ ;  $**P < 0.01$ , one-way ANOVA).

C Mean dendrite length per cell (M18<sub>WT</sub>:  $1226 \pm 61$   $\mu\text{m}$ ,  $n = 51$ ; M18<sub>S241A</sub>:  $1084 \pm 65$   $\mu\text{m}$ ,  $n = 46$ ; M18<sub>S241D</sub>:  $971 \pm 59$   $\mu\text{m}$ ,  $n = 40$ ;  $*P < 0.05$ , one-way ANOVA).

D Number of synapses per  $\mu\text{m}$  dendrite length (M18<sub>WT</sub>:  $0.179 \pm 0.008$ ,  $n = 51$ ; M18<sub>S241A</sub>:  $0.193 \pm 0.012$ ,  $n = 46$ ; M18<sub>S241D</sub>:  $0.153 \pm 0.010$ ,  $n = 40$ ;  $*P < 0.05$ , one-way ANOVA).

E Mean synapse area (M18<sub>WT</sub>:  $1.08 \pm 0.02$   $\mu\text{m}^2$ ,  $n = 51$ ; M18<sub>S241A</sub>:  $1.16 \pm 0.03$   $\mu\text{m}^2$ ,  $n = 46$ ; M18<sub>S241D</sub>:  $1.26 \pm 0.04$   $\mu\text{m}^2$ ,  $n = 40$ ;  $***P < 0.001$ , one-way ANOVA).

F Number of dendritic branches as a function of radial distance from the soma quantified by Sholl analysis.

G Number of synapses as a function of radial distance from the soma.

H Mean somatic syntaxin intensity (M18<sub>WT</sub>:  $485 \pm 19$ ,  $n = 49$ ; M18<sub>S241A</sub>:  $554 \pm 23$ ,  $n = 46$ ; M18<sub>S241D</sub>:  $343 \pm 14$ ,  $n = 39$ ;  $***P < 0.001$ , one-way ANOVA).

I Mean synaptic syntaxin intensity (M18<sub>WT</sub>:  $875 \pm 35$ ,  $n = 51$ ; M18<sub>S241A</sub>:  $1,058 \pm 42$ ,  $n = 46$ ; M18<sub>S241D</sub>:  $458 \pm 19$ ,  $n = 40$ ;  $**P < 0.01$ ;  $***P < 0.001$ , one-way ANOVA).

J Mean synaptic syntaxin intensity as a function of radial distance from the soma.

K Cumulative probability plot of synaptic syntaxin intensity.

Data information: Data are expressed as mean  $\pm$  SEM.

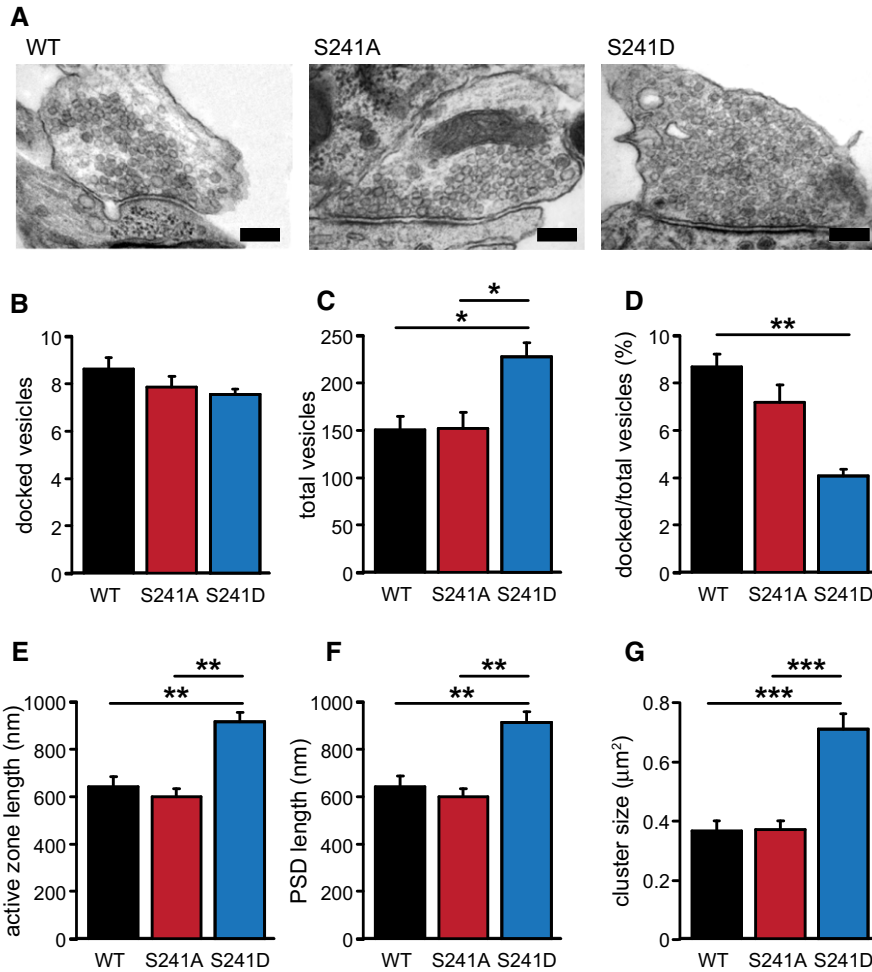

**Figure EV3. Ultra-structural morphology of rescued Munc18-1 null mutant cells.**

Related to Figure 4. Electron microscopy analysis of hippocampal autaptic neurons of Munc18-1 null mutant mice rescued with lentiviruses expressing M18<sub>WT</sub>, M18<sub>S241A</sub>, or M18<sub>S241D</sub>. *N*<sub>cultures</sub> = 3, M18<sub>WT</sub>: *n*<sub>cells</sub> = 6, *n*<sub>synapses</sub> = 138; M18<sub>S241A</sub>: *n*<sub>cells</sub> = 5, *n*<sub>synapses</sub> = 146; M18<sub>S241D</sub>: *n*<sub>cells</sub> = 3, *n*<sub>synapses</sub> = 77. Synapses were averaged per cell. Graphs represent cell averages.

- A Typical examples. Scale bar represents 200 nm.
- B Mean number of docked vesicles (M18<sub>WT</sub>: 8.64 ± 0.48; M18<sub>S241A</sub>: 7.89 ± 0.44; M18<sub>S241D</sub>: 7.57 ± 0.22, n.s., one-way ANOVA). *n* = 3.
- C Mean number of total vesicles (M18<sub>WT</sub>: 151.99 ± 14.28; M18<sub>S241A</sub>: 152.65 ± 16.54; M18<sub>S241D</sub>: 228.16 ± 15.86; \**P* < 0.05, one-way ANOVA). *n* = 3.
- D Percentage of docked vesicles out of total number of vesicles (M18<sub>WT</sub>: 8.69 ± 0.55; M18<sub>S241A</sub>: 7.20 ± 0.74; M18<sub>S241D</sub>: 4.09 ± 0.28; \*\**P* < 0.01, one-way ANOVA). *n* = 3.
- E Mean active zone length (M18<sub>WT</sub>: 643.12 ± 43.84 nm; M18<sub>S241A</sub>: 601.62 ± 33.45 nm; M18<sub>S241D</sub>: 918.24 ± 39.47 nm; \*\**P* < 0.01, one-way ANOVA). *n* = 3.
- F Mean postsynaptic density (PSD) length (M18<sub>WT</sub>: 644.70 ± 43.74 nm; M18<sub>S241A</sub>: 603.05 ± 33.49 nm; M18<sub>S241D</sub>: 914.09 ± 47.52 nm; \*\**P* < 0.01, one-way ANOVA). *n* = 3.
- G Mean cluster size (M18<sub>WT</sub>: 2.97 ± 0.15 μm<sup>2</sup>; M18<sub>S241A</sub>: 3.00 ± 0.11 μm<sup>2</sup>; M18<sub>S241D</sub>: 4.40 ± 0.23 μm<sup>2</sup>; \*\*\**P* < 0.001, one-way ANOVA). *n* = 3.

Data information: Data are expressed as mean ± SEM.

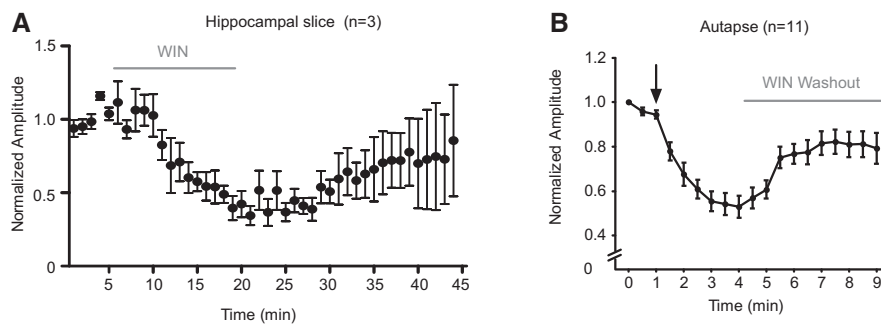

**Figure EV4. WIN55,212-2-induced depression of transmission is reversible.**

Related to Figure 7.

- A Normalized EPSC amplitudes in hippocampal CA1 neurons during and after a 15-min application of 5 μM WIN55,212-2 (gray bar) shows the gradual recovery of EPSCs after WIN washout (*n* = 3 slices).
- B Normalized EPSC amplitudes in wild-type hippocampal autapses during and after 30-s application of 1 μM WIN55,212-2 shows recovery during WIN washout (gray bar) (*n* = 11 neurons).

Data information: Data are expressed as mean ± SEM.

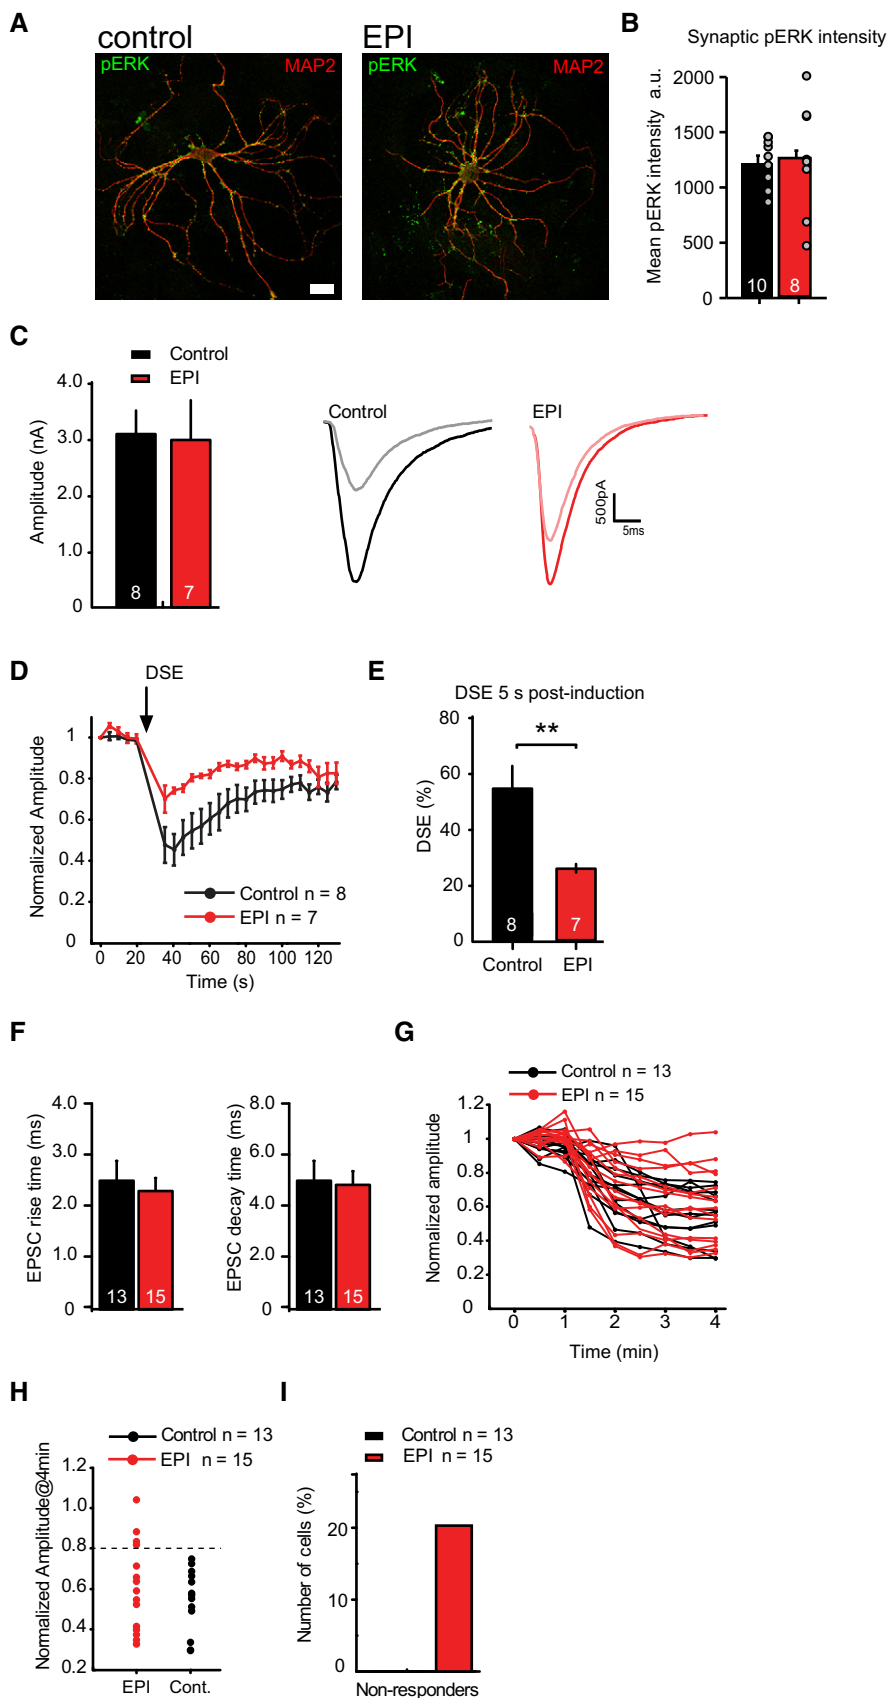

**Figure EV5. ERK pathway inhibition decreases depolarization-induced suppression of excitation (DSE) and WIN5,212-2-induced depression in a subset of cultured neurons.**

Related to Figure 7.

**A** Typical examples of isolated neurons pretreated with ERK inhibitors (EPI) or DMSO (control) for 3 h. Dendritic marker MAP2 (red), phospho-ERK antibody (pERK, green). Scale bar represents 10  $\mu$ m.

**B** Semi-quantitative analysis of phospho-ERK intensities at synapses (identified by VAMP2, not shown) shows that pretreatment with ERK inhibitors does not result in reduction of phospho-ERK levels in all neurons (control  $n = 10$  neurons, EPI  $n = 8$  neurons). In these neurons, ERK appears to remain in a phosphorylated state much longer than in hippocampal slices (compare with Fig 3C).

**C–E** DSE duration and amplitude is decreased in hippocampal autaptic neurons upon ERK pathway inhibition compared to control. **(C)** Left: Average EPSC amplitude in wild-type autaptic neurons before a 10-s depolarizing pulse in control and ERK pathway inhibitors (EPI: 20  $\mu$ M PD98059 and 10  $\mu$ M U0126, applied 3 h before recordings) pretreated neurons is similar (control:  $3.1 \pm 0.4$  nA,  $n = 8$ ; EPI:  $3.0 \pm 0.7$  nA,  $n = 7$ ). Right: Examples of average EPSC traces for control (black and gray) and EPI (red and pink)-treated neurons prior to and after DSE, respectively. **(D)** Time course of normalized EPSC amplitudes recorded before and after a 10-s depolarizing pulse to 0 mV (DSE, indicated by the arrow) in wild-type autaptic neurons in the absence (control) or presence of ERK pathway inhibitors (EPI) (control  $n = 8$ , EPI  $n = 7$  from 2 independent experiments). **(E)** DSE effect size in control and EPI-treated autapses 5 s after a 10-s depolarizing pulse to 0 mV (control  $n = 8$ , EPI  $n = 7$ ,  $**P < 0.01$ , Mann–Whitney  $U$ -test).

**F–H** ERK pathway inhibitors block effect of CB1 agonist WIN5,212-2 in a subset of hippocampal autaptic neurons. **(F)** EPSC rise and decay times of control (black bars) and EPI (red bars)-treated neurons prior to WIN5,212-2 application are similar. **(G)** Effect of 1  $\mu$ M WIN application in individual cells after 4 min (start of application is at  $t = 1$  min) in the absence (control,  $n = 13$ ) and presence of ERK pathway inhibitors (EPI: 20  $\mu$ M PD98059 and 10  $\mu$ M U0126, applied 3 h before recordings,  $n = 15$ ). **(H)** Normalized EPSC amplitudes 4 min after WIN application in control and EPI neurons. The dashed line represents cutoff used to distinguish non-responders (EPSC rundown < 20%) and responders (EPSC rundown > 20%) in **(G)**.

**I** Ratio of non-responding versus responding neurons to 1  $\mu$ M WIN application shows that in 20% of EPI-treated neurons, EPSC during WIN application remained above 80% of EPSC before WIN stimulation. In control cells, WIN application resulted in > 20% reduction of EPSCs in all neurons tested.

Data information: Data are expressed as mean  $\pm$  SEM.
