# Supplementary material
Source: PubMed Central journal article supplement (PMC4888233)

Figure 2 D

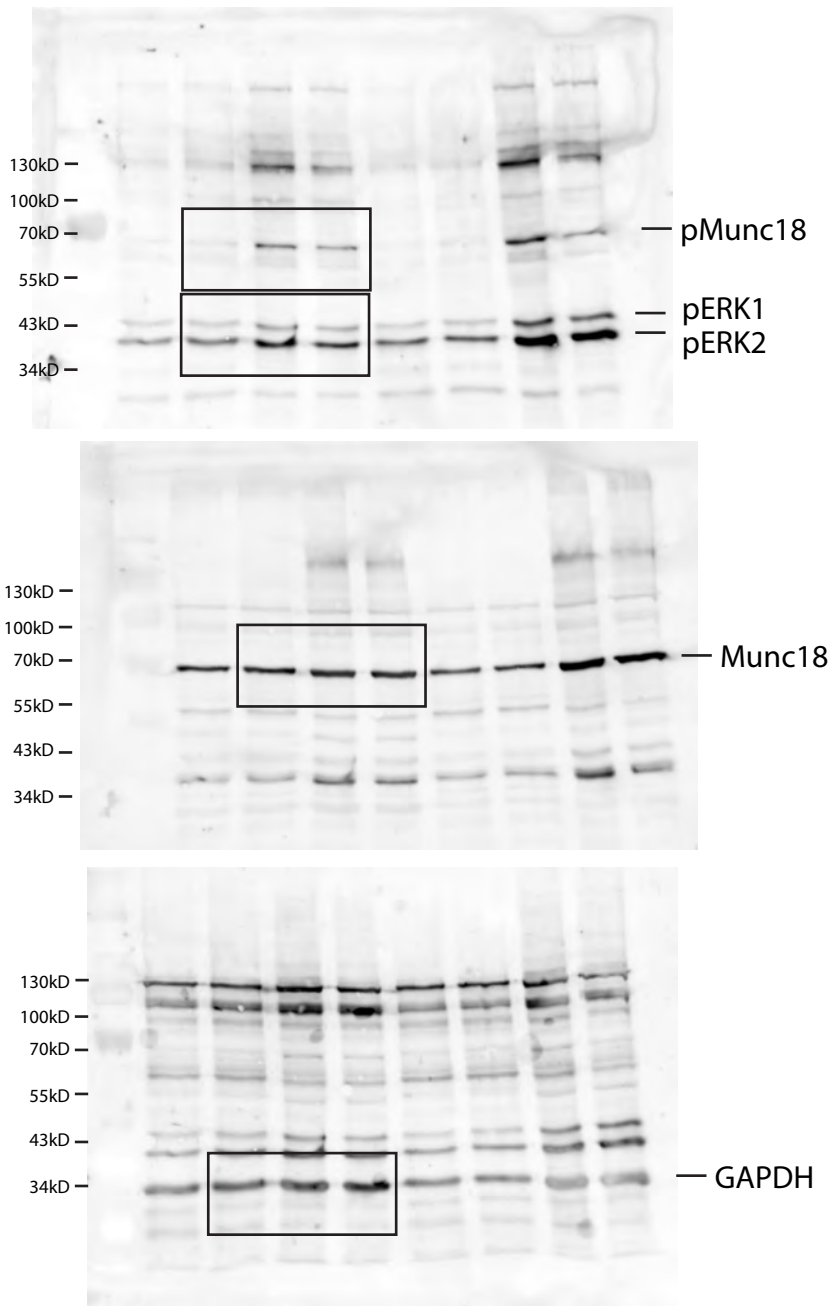

Supplement: EMBJ-35-1236-s003.pdf [file EMBJ-35-1236-s003.pdf]

Figure 3 A

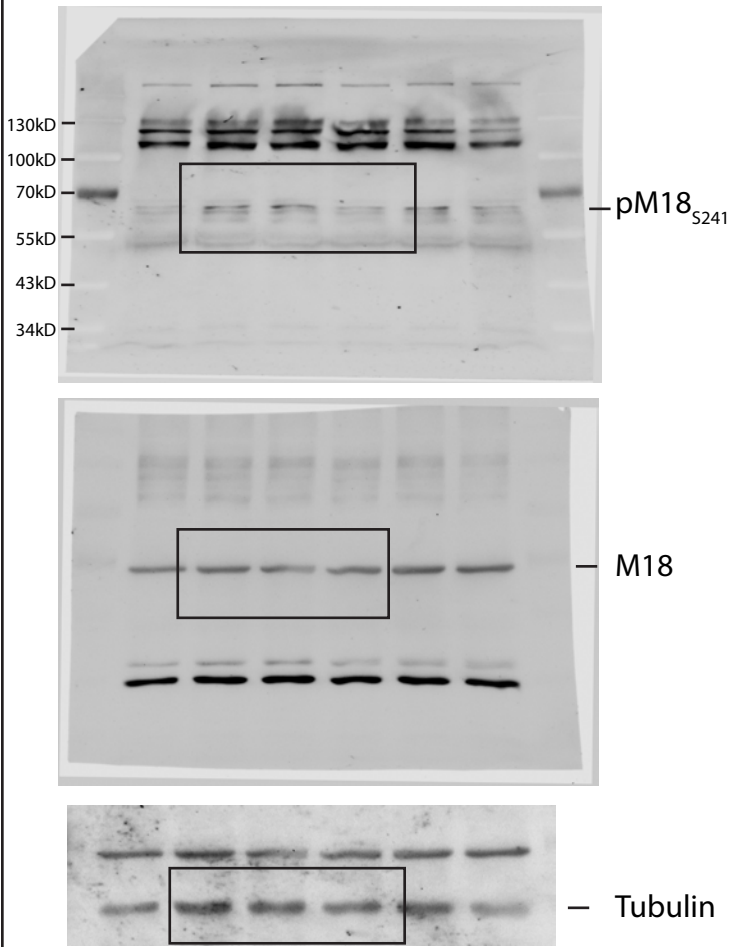

Figure 3 C

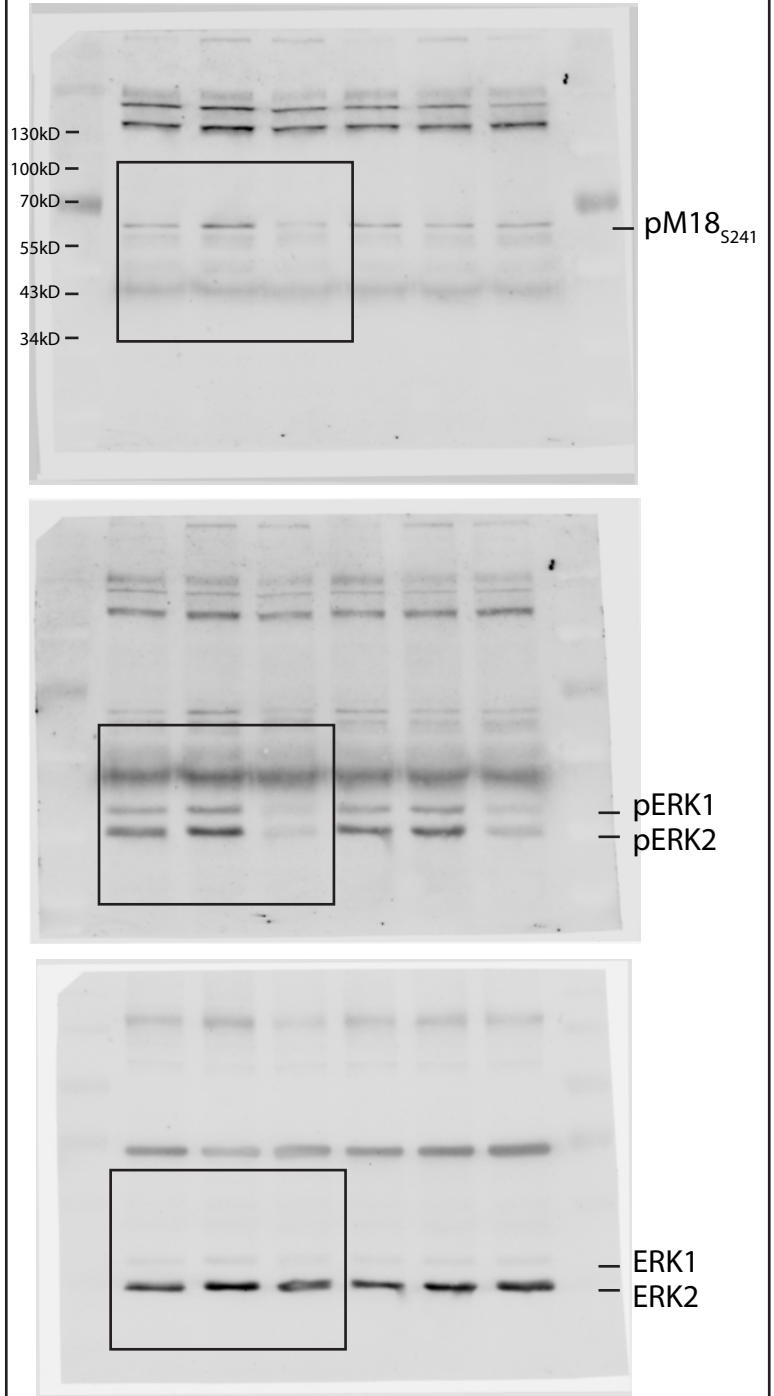

Figure 3 E BDNF

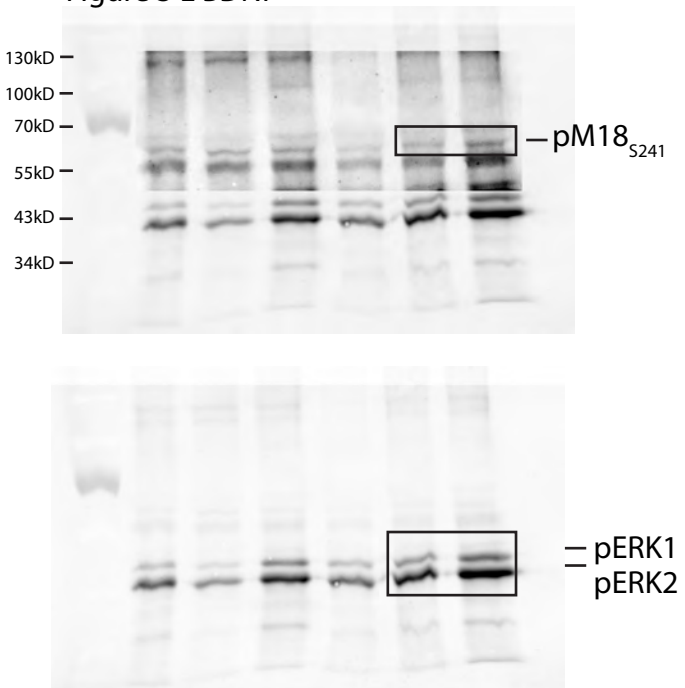

Figure 3 E LY379268

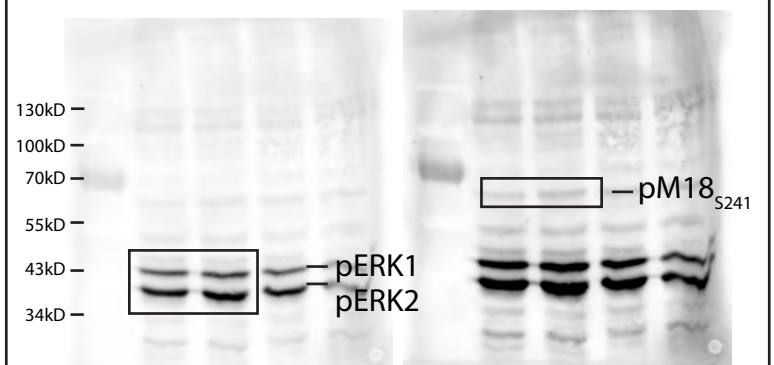

Supplement: EMBJ-35-1236-s004.pdf [file EMBJ-35-1236-s004.pdf]

Figure 5H

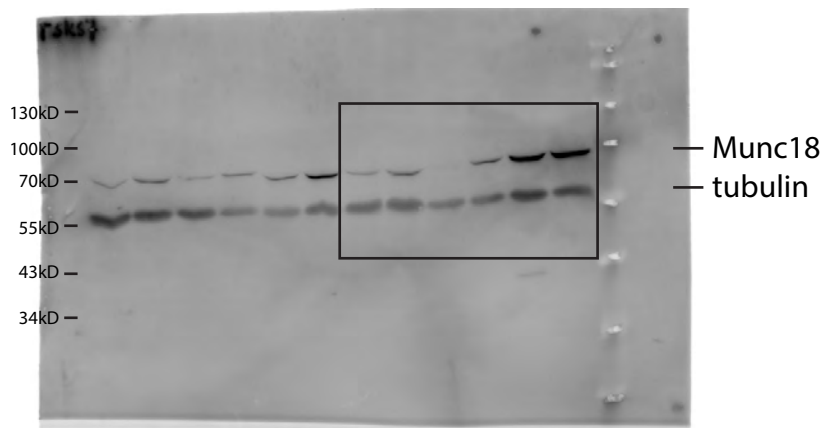

Figure 5J

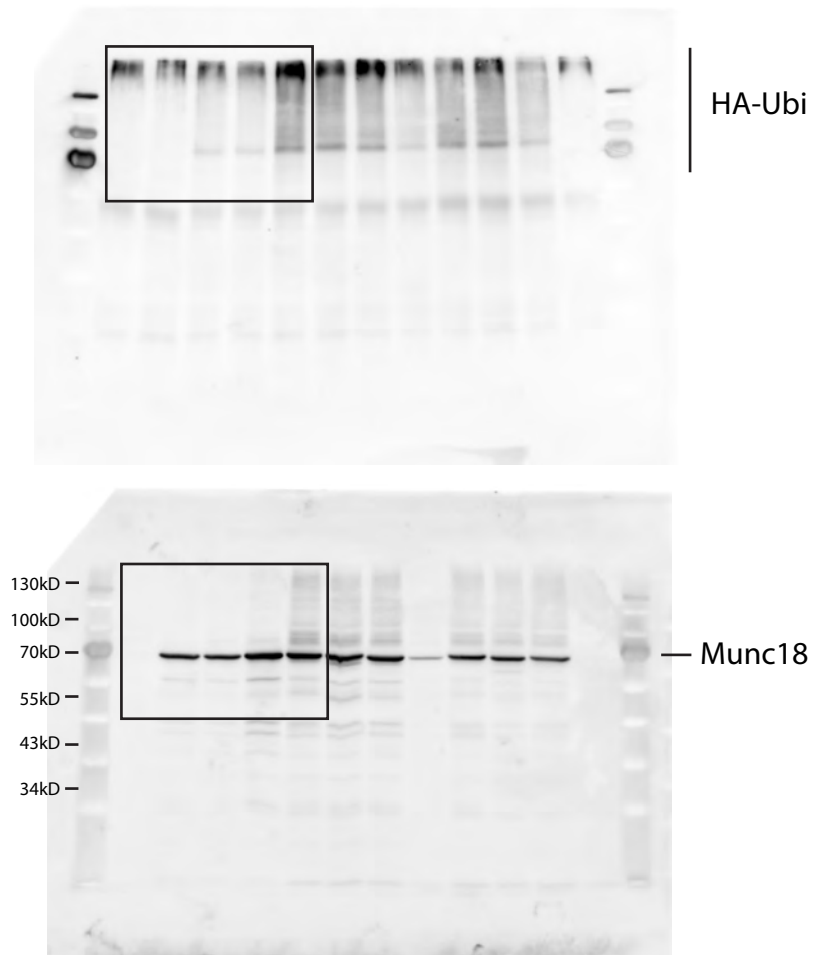

Supplement: EMBJ-35-1236-s005.pdf [file EMBJ-35-1236-s005.pdf]

Figure 6 A

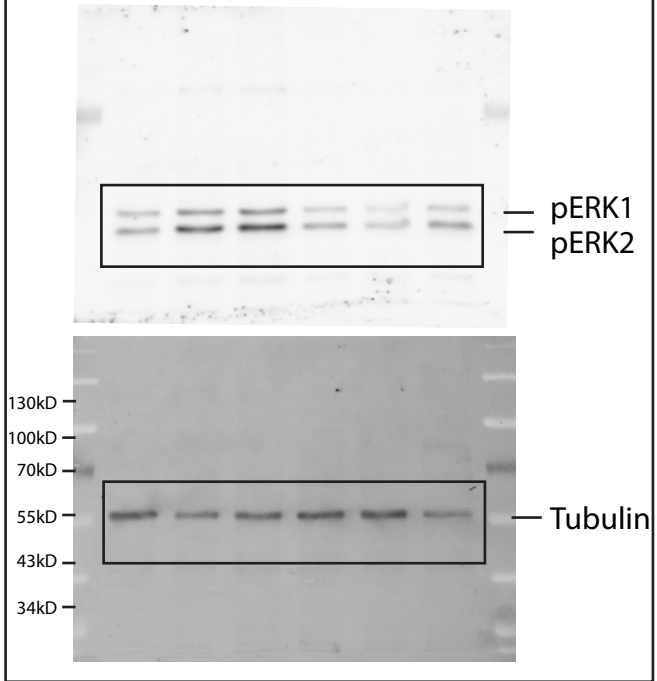

Supplement: EMBJ-35-1236-s006.pdf [file EMBJ-35-1236-s006.pdf]
